# Supplementary material for: 3-[5-(1H-Indol-3-ylmethylene)-4-oxo-2-thioxothiazolidin-3-yl]-propionic Acid as a Potential Polypharmacological Agent
Source: MDPI journal article supplement (doi:10.3390/scipharm91010013), 2023-03-02
Supplement: s1 [file s1]

Supplementary materials

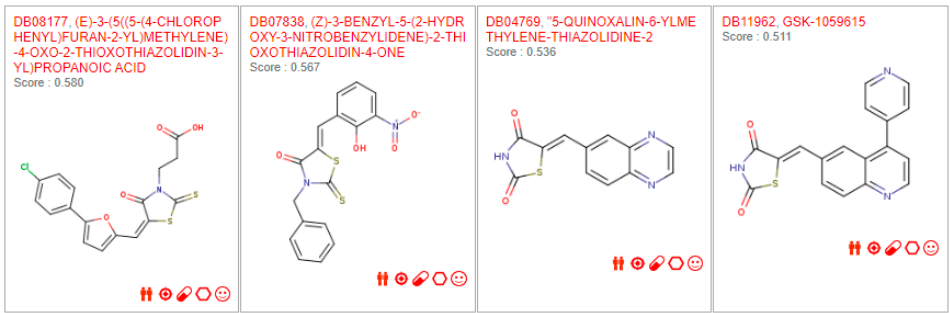

Figure S1. Similarity search on similar drug candidates or known bioactive molecules for the tested compound.

| Target                                           | Common name | Uniprot ID | ChEMBL ID  | Target Class     | Probability*           | Known actives (3D/2D)     |
|--------------------------------------------------|-------------|------------|------------|------------------|------------------------|---------------------------|
| Lysosomal protective protein                     | CTSA        | P10619     | CHEMBL6115 | Protease         | <div><div></div></div> | 315 / 0 <a href="#">↓</a> |
| Thromboxane-A synthase                           | TBXAS1      | P24557     | CHEMBL1835 | Cytochrome P450  | <div><div></div></div> | 230 / 0 <a href="#">↓</a> |
| Peroxisome proliferator-activated receptor gamma | PPARG       | P37231     | CHEMBL235  | Nuclear receptor | <div><div></div></div> | 202 / 3 <a href="#">↓</a> |

Figure S2. Target prediction for a tested compound using SwissTargetPrediction.
